# Supplementary material for: Upregulation of miR-33 Exacerbates Heat-Stress-Induced Apoptosis in Granulosa Cell and Follicular Atresia of Nile Tilapia (Oreochromis niloticus) by Targeting TGFβ1I1
Source: MDPI journal article supplement (doi:10.3390/genes13061009), 2022-06-02
Supplement: s1 [file s1]

Table S1 The primer sequence of the gene in this experiment

| Name               | Primer sequence (5'-3')                                            |
|--------------------|--------------------------------------------------------------------|
| <b>Bax</b>         | F:5'-ATTCGCTCCTACTTCGGCAC-3'<br>R:5'-GTTCTTCCTGTTGAGCGGGT-3'       |
| <b>Caspase-3</b>   | F:5'- TGAATTTCCGGGCCTGAGTG-3'<br>R:5'-GACAGACCGTCATCGTGCTT-3'      |
| <b>Bcl-2</b>       | F:5'-GACGATGATGCCAGGGAGAG-3'<br>R:5'- CTCAGAGTTCACTGGAGCGG-3'      |
| <b>Caspase-8</b>   | F:5'- CAGACTCAGCATGTCTGCCA-3'<br>R:5'- ATAACGTGTCCCTCCGCATC-3'     |
| <b>TGFβ1I1</b>     | F:5'- CAGGACCGACGCAGACAATA-3'<br>R:5'- CTCAGGCACTCCCAAATCCT-3'     |
| <b>VEGFA</b>       | F: 5'- CCAGTGAGAGCATACTGGC -3'<br>R: 5'- TTTCCCCTCTTGACACAGC -3'   |
| <b>VEGFB</b>       | F: 5'- CTGACGAGGCTTTCGAGTGT -3'<br>R: 5'- GTGTAGGCTGGAGGTGTTCC -3' |
| <b>KDR</b>         | F: 5'- TCCACTGCAGGCTGTTTTCA -3'<br>R: 5'- CGCTGCAGCAAAACAAGTGA -3' |
| <b>β-actin</b>     | F:5'- CCACACAGTGCCCATCTACGA-3'<br>R:5'- CCACGCTCTGTCAGGATCTTCA -3' |
| <b>miR-27e</b>     | AAGCGACCTCACACAGGTTGGC                                             |
| <b>miR-27b-3p</b>  | AACACGCACAGAATCGTTTCTG                                             |
| <b>miR-33</b>      | AACACGCAGCCACTGACTAAC                                              |
| <b>miR-34a</b>     | AAGCGACCTGTGTGTGTGTGTG                                             |
| <b>miR-133a-5p</b> | AAGCGACCCTATACAGTCTACTG                                            |
| <b>miR-301b-5p</b> | AACACGCCTGCCCTGGCCCGAG                                             |
